# Supplementary material for: Accelerating the Production of Druggable Targets: Eukaryotic Cell-Free Systems Come into Focus
Source: PubMed Central journal article supplement (PMC6632147; doi:10.3390/mps2020030), 2019-04-16
Supplement: mps-02-00030-s001.pdf [file mps-02-00030-s001.pdf]

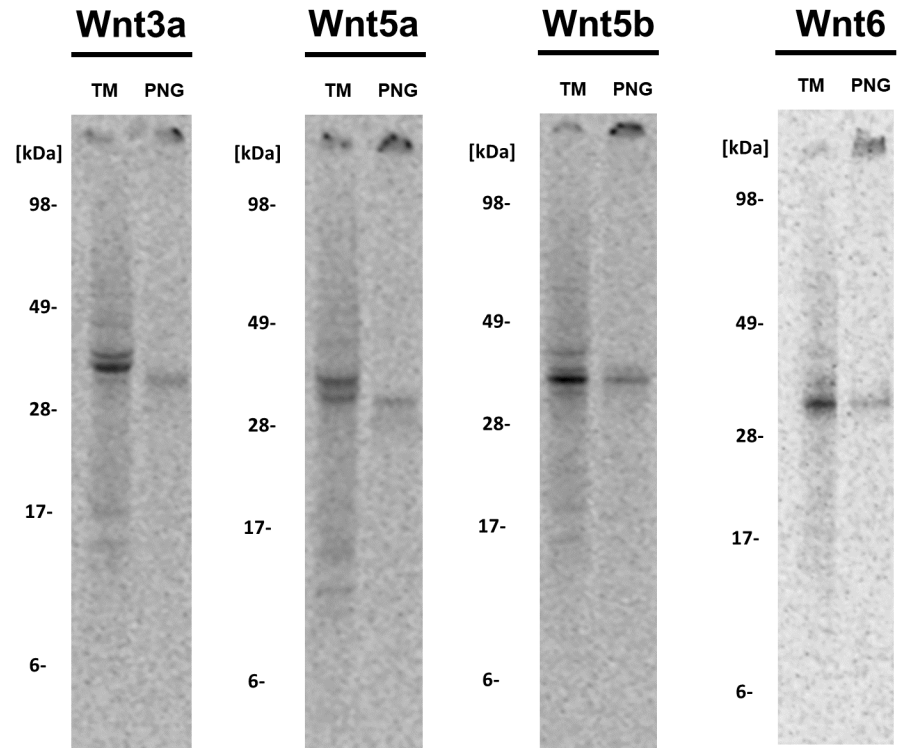

**Glycosylation of cell-free synthesized WNT-Signalling Pathway receptor ligands WNT3a, WNT5a, WNT5b, WNT6.** WNT synthesis is performed in a linked transcription-translation system in the presence of  $^{14}\text{C}$  leucine. Glycosylation analysis of cell-free expressed WNT ligands was performed by PNGase F digestion. An aliquot of 5  $\mu\text{l}$  of radiolabeled protein (Translation mixture (TM) and PNGaseF digested sample (PNG)) was acetone precipitated, applied to SDS-PAGE and analyzed using a phosphoimager (Typhoon TRIO PLUS, Amersham).
